# Supplementary material for: Psidium guajava L. hydroethanolic extract as endodontic irrigant: phytochemical analysis, antioxidant activity, antimicrobial action and biocompatibility
Source: PeerJ. 2025 Apr 14;13:e19301. doi: 10.7717/peerj.19301 (PMC12005180; doi:10.7717/peerj.19301)
Supplement: Supplemental Information 1 [file peerj-13-19301-s001.xlsx]

## Sheet: Plate 1 - Sheet1
Software Version	3.10.06
Experiment File Path:
Protocol File Path:
Plate Number	Plate 1
Date	2024-11-12
Time	14:34:50
Reader Type:	Epoch
Reader Serial Number:	201104F
Reading Type	Reader
Procedure Details
Plate Type	96 WELL PLATE
Eject plate on completion
Read	Absorbance Endpoint
	Full Plate
	Wavelengths: 570
	Read Speed: Normal, Delay: 100 msec, Measurements/Data Point: 8
Results
Actual Temperature:	0
		1	2	3	4	5	6	7	8	9	10	11	12
	A	0.518	0.423	0.428	0.427	0.395	0.417	0.404	0.435	0.451	0.476	0.42	0.39	570
	B	0.543	0.429	0.405	0.464	0.389	0.41	0.427	0.443	0.439	0.456	0.5	0.404	570
	C	0.516	0.416	0.398	0.41	0.409	0.425	0.412	0.437	0.434	0.46	0.459	0.416	570
	D	0.487	0.438	0.404	0.497	0.422	0.41	0.417	0.436	0.404	0.424	0.489	0.432	570
	E	0.556	0.402	0.383	0.392	0.405	0.4	0.406	0.42	0.4	0.42	0.424	0.417	570
	F	0.531	0.408	0.412	0.406	0.418	0.427	0.408	0.411	0.409	0.44	0.422	0.395	570
	G	0.533	0.409	0.4	0.413	0.404	0.412	0.414	0.437	0.411	0.441	0.4	0.419	570
	H	0.539	0.46	0.442	0.404	0.414	0.471	0.46	0.448	0.415	0.437	0.443	0.446	570
