# Supplementary material for: Psidium guajava L. hydroethanolic extract as endodontic irrigant: phytochemical analysis, antioxidant activity, antimicrobial action and biocompatibility
Source: PeerJ. 2025 Apr 14;13:e19301. doi: 10.7717/peerj.19301 (PMC12005180; doi:10.7717/peerj.19301)
Supplement: Supplemental Information 2 [file peerj-13-19301-s002.xlsx]

## Sheet: ATCC faecalis
	1	2	3	4	5	6	7	8	9	10	11	12
A	0.097	1.105	0.855	0.567	0.595	0.597	0.568	0.667	0.533	0.084	0.448	0.422
B	0.083	0.408	0.356	0.313	0.344	0.376	0.339	0.226	0.17	0.068	0.553	0.3
C	0.064	0.375	0.221	0.299	0.247	0.229	0.47	0.209	0.326	0.062	0.975	0.431
D	0.044	0.196	0.315	0.374	0.519	0.297	0.441	0.31	0.169	0.065	0.323	0.88
E	0.08	0.359	0.588	0.442	0.541	0.683	0.482	0.25	0.111	0.086	0.267	0.687
F	0.168	0.744	0.46	0.658	0.462	0.608	0.518	0.319	0.225	0.076	0.571	0.16
G	0.074	0.048	0.047	0.046	0.049	0.048	0.049	0.049	0.048	0.121	0.565	0.199
H	0.068	0.047	0.047	0.046	0.046	0.047	0.047	0.049	0.047	0.061	0.647	0.148

## Sheet: 4.2 faecalis
	1	2	3	4	5	6	7	8	9	10	11	12
A	0.045	1.276	1.245	1.129	1.005	1.372	1.284	1.117	1.329	0.06	0.4	0.722
B	0.043	1.287	0.876	0.608	0.67	0.64	0.73	0.667	0.649	0.073	0.415	0.676
C	0.047	1.227	0.967	0.787	0.577	0.707	0.562	0.425	0.453	0.078	0.689	0.778
D	0.043	0.432	1.08	0.451	0.559	0.829	0.837	0.514	0.476	0.058	0.346	0.964
E	0.069	0.525	0.767	0.372	0.459	0.366	0.542	0.459	0.59	0.083	0.574	1.364
F	0.101	0.587	0.548	0.539	0.514	0.373	0.507	0.455	0.604	0.068	0.575	1.18
G	0.079	0.05	0.047	0.048	0.05	0.051	0.05	0.048	0.048	0.086	0.394	0.68
H	0.07	0.045	0.047	0.047	0.048	0.047	0.047	0.05	0.047	0.073	0.62	1.098

## Sheet: 4 faecalis
	1	2	3	4	5	6	7	8	9	10	11	12
A	0.048	1.218	0.984	1.035	1.538	1.273	1.106	1.679	1.177	0.065	0.292	1.335
B	0.041	1.198	1.555	1.299	1.327	1.568	1.178	1.804	1.255	0.087	0.946	1.072
C	0.042	1.426	1.49	1.411	1.538	1.128	1.308	1.513	1.18	0.098	0.805	0.409
D	0.043	1.473	1.63	1.526	1.407	1.394	1.265	1.261	0.869	0.105	1.128	0.272
E	0.047	1.904	1.423	1.442	1.905	1.455	1.31	2.089	1.194	0.058	0.556	0.886
F	0.042	1.608	1.743	1.355	1.775	2.119	1.328	1.698	0.824	0.186	1.843	0.351
G	0.045	0.045	0.048	0.049	0.052	0.05	0.051	0.049	0.055	0.081	0.444	0.331
H	0.044	0.045	0.049	0.048	0.046	0.048	0.046	0.047	0.047	0.065	0.502	0.356

## Sheet: Candida 60
	1	2	3	4	5	6	7	8	9	10	11	12
A	0.045	0.882	1.009	1.035	0.969	1.101	0.597	0.979	1.014	0.082	0.13	0.351
B	0.043	0.493	0.579	0.58	0.446	0.402	0.577	0.604	0.452	0.116	0.164	0.571
C	0.044	0.225	0.21	0.173	0.176	0.178	0.21	0.254	0.077	0.079	0.137	0.361
D	0.041	0.039	0.043	0.042	0.044	0.04	0.04	0.041	0.043	0.097	0.155	0.298
E	0.045	0.05	0.048	0.05	0.048	0.04	0.046	0.046	0.048	0.071	0.127	0.26
F	0.041	0.051	0.043	0.049	0.048	0.044	0.046	0.042	0.044	0.077	0.142	0.587
G	0.05	0.047	0.046	0.046	0.05	0.051	0.048	0.051	0.047	0.085	0.097	0.515
H	0.04	0.046	0.048	0.047	0.046	0.05	0.046	0.047	0.051	0.082	0.18	0.374

## Sheet: Candida ATCC
	1	2	3	4	5	6	7	8	9	10	11	12
A	0.05	2.467	1.188	0.936	1.269	0.88	0.555	0.707	0.718	0.084	0.158	0.792
B	0.055	0.792	0.788	0.751	0.758	0.623	0.436	0.327	0.671	0.091	0.207	0.245
C	0.039	0.299	0.332	0.254	0.36	0.406	0.324	0.278	0.339	0.08	0.171	0.243
D	0.055	0.047	0.047	0.047	0.046	0.045	0.045	0.045	0.047	0.119	0.227	0.284
E	0.058	0.048	0.054	0.047	0.045	0.045	0.047	0.045	0.049	0.114	0.292	0.808
F	0.056	0.049	0.048	0.045	0.044	0.046	0.048	0.046	0.045	0.12	0.268	0.364
G	0.045	0.048	0.045	0.048	0.047	0.046	0.046	0.046	0.045	0.244	0.383	0.632
H	0.055	0.045	0.045	0.045	0.048	0.047	0.046	0.046	0.045	0.132	0.263	0.605

## Sheet: Candida 14
	1	2	3	4	5	6	7	8	9	10	11	12
A	0.09	1.185	1.103	1.077	1.283	1.402	0.809	0.927	0.95	0.114	0.182	0.462
B	0.094	0.852	0.772	1.277	1.078	1.518	1.637	1.151	1.17	0.114	0.119	1.075
C	0.083	0.483	0.522	0.474	0.463	0.656	0.742	0.505	0.618	0.09	0.148	1.005
D	0.11	0.049	0.048	0.049	0.049	0.048	0.045	0.047	0.048	0.092	0.151	0.401
E	0.061	0.049	0.048	0.06	0.049	0.057	0.048	0.047	0.046	0.105	0.137	0.641
F	0.064	0.052	0.052	0.047	0.046	0.046	0.05	0.046	0.049	0.1	0.224	0.44
G	0.13	0.06	0.047	0.047	0.048	0.048	0.048	0.046	0.049	0.086	0.203	0.407
H	0.05	0.045	0.049	0.048	0.046	0.056	0.047	0.047	0.046	0.073	0.116	0.323
